# Supplementary material for: Centromere deletion in Cryptococcus deuterogattii leads to neocentromere formation and chromosome fusions
Source: eLife. 2020 Apr 20;9:e56026. doi: 10.7554/eLife.56026 (PMC7188483; doi:10.7554/eLife.56026)
Supplement: Supplementary file 1. — To exclude the possibility that transposable elements were deposited into the neocentromeres, BlastN searches in a database with de novo genome assemblies of cen10∆-A, cen10∆-B, cen10∆-C, and cen10∆-E were performed. As input the homologous wild-type sequence of the chromosomal location of the neocentromeres was used. All neocentromeres of the tested cen10∆ mutants have the same length as the homologous sequence in the wild -type. [file elife-56026-supp1.xlsx]

## Sheet: Sup table 4
Supplementary File 1. Neocentromeres are not enriched with transposable elements.
Isolate	Chromosome/scaffold	% Identical	Alignment	# Mismatches	# Gap	Alignment in query		Alignment in subject		Evalue	Bitscore
		matches	length		openings	Start (bp)	End (bp)	Start (bp)	End (bp)
WT	scaffold3.10	100	4537	0	0	1	4537	115939	120475	0	8379
WT	scaffold3.10	100	3179	0	0	1	3179	390605	393783	0	5871
cen10Δ-A	NODE_39	100	4537	0	0	1	4537	17760	13224	0	8379
cen10Δ-A	NODE_11	100	3179	0	0	1	3179	242270	245448	0	5871
cen10Δ-B	NODE_42	100	4537	0	0	1	4537	17765	13229	0	8379
cen10Δ-B	NODE_10	100	3179	0	0	1	3179	250468	253646	0	5871
cen10Δ-C-L1	NODE_42	100	4537	0	0	1	4537	115954	120490	0	8379
cen10Δ-C-L1	NODE_10	100	3179	0	0	1	3179	266017	262839	0	5871
cen10Δ-C-L2	NODE_59	100	4537	0	0	1	4537	61353	65889	0	8379
cen10Δ-C-L2	NODE_26	100	3179	0	0	1	3179	242325	245503	0	5871
cen10Δ-E	NODE_41	100	4537	0	0	1	4537	25951	21415	0	8379
cen10Δ-E	NODE_9	100	3179	0	0	1	3179	242271	245449	0	5871
To exclude the possibility that transposable elements were deposited into the neocentromeres, BlastN searches in a database with de novo genome
assemblies of cen10Δ-A, cen10Δ-B, cen10Δ-C, and cen10Δ-E were performed. As input the homologous wild-type sequence of the chromosomal location of the
neocentromeres was used. All neocentromeres of the tested cen10Δ mutants have the same length as the homologous sequence in the wild-type.
