# Supplementary material for: Centromere deletion in Cryptococcus deuterogattii leads to neocentromere formation and chromosome fusions
Source: eLife. 2020 Apr 20;9:e56026. doi: 10.7554/eLife.56026 (PMC7188483; doi:10.7554/eLife.56026)
Supplement: Supplementary file 2. — Expression levels of genes where neocentromeres formed in the cenΔ mutants were analyzed in the R265 wild-type strain. Previously generated RNA sequencing data were remapped to the R265 reference genome, and the expression levels (FPKM) were analyzed for the native genes in each region wherein a neocentromere was formed in the cenΔ mutants. Expression analysis of several housekeeping genes was included for control purposes, and the median RNA expression level of all genes located on chromosomes 9 and 10 are listed. Expression levels of genes located in the subtelomeric regions were also analyzed. [file elife-56026-supp2.xlsx]

## Sheet: Sup table 3
Supplementary File 2. Neocentromeric regions are expressed in the wild-type strain.
	Gene	Gene ID	FPKM value	Present after chromosome fusion
cen9∆-A	Escrt-II complex subunit (VPS25)	CNBG_5690	36.986
	Iron regulator 1	CNBG_9614	60.8874
cen9∆-B	Xylosylphosphotransferase	CNBG_5687	77.0184
	Transglycosylase SLT domain-containing protein	CNBG_9613	68.995
	Glutamate synthase (NADPH/NADH)	CNBG_5689	47.8433
cen9∆-C	Xylosylphosphotransferase	CNBG_5687	77.0184
	Transglycosylase SLT domain-containing protein	CNBG_9613	68.995
	Glutamate synthase (NADPH/NADH)	CNBG_5689	47.8433
cen9∆-D	Transitional endoplasmic reticulum ATPase	CNBG_5683	261.715
	Derlin-2/3	CNBG_5685	38.7255
cen9∆-E	Xylosylphosphotransferase	CNBG_5687	77.0184
	Transglycosylase SLT domain-containing protein	CNBG_9613	68.995
	Glutamate synthase (NADPH/NADH)	CNBG_5689	47.8433
cen9∆-F	Xylosylphosphotransferase (XPT1)	CNBG_5687	77.0184
cen10∆-A	CENPC/MIF2	CNBG_4461	80.2123
	Hypothetical protein	CNBG_4462	76.6992
	Serine/threonine-protein phosphatase 2A activator 2(RRD2)	CNBG_9459	61.1272
	Hypothetical protein	CNBG_4366	13.4265
	Hypothetical protein	CNBG_4365	279.743
cen10∆-B	CENPC/MIF2	CNBG_4461	80.2123
	Hypothetical protein	CNBG_4462	76.6992
cen10∆-C	CENPC/MIF2	CNBG_4461	80.2123
	Hypothetical protein	CNBG_4462	76.6992
	Serine/threonine-protein phosphatase 2A activator 2(RRD2)	CNBG_9459	61.1272
	Hypothetical protein	CNBG_4366	13.4265
	Hypothetical protein	CNBG_4365	279.743
cen10∆-D	Ser/Thr protein kinase	CNBG_4379	23.1999
cen10∆-E	Hypothetical protein	CNBG_10450
	Hypothetical protein	CNBG_4495	4.14905
cen10∆-F	Hypothetical protein	CNBG_4383	54.7738
	Hypothetical protein	CNBG_10075
	Hexokinase (HXK1)	CNBG_4382	181.214
cen10∆-G	High osmolarity signaling protein (SHO1)	CNBG_4373	162.575
	Hypothetical protein	CNBG_4372	30.9831
	Hypothetical protein	CNBG_4371
	Hypothetical protein	CNBG_4370	62.6569
Housekeeping genes	Actin	CNBG_1429	1871.39
	Histone H3	CNBG_5663	992.681
	Tubulin beta chain	CNBG_3361	2070.41
	Tubulin alpha-1A	CNBG_0187	1354.83
	CENPA	CNBG_0491	139.077
Median	Median expression of all genes on chromosome 9		96.856
	Median expression of all genes on chromosome 10		96.292
Subtelomeric regions	10R	CNBG_6141	13.2507	X
	10R	CNBG_6142	17.7561	X
	10R	CNBG_6143	56.1247	X
	10R	CNBG_6144	27.9953	✔️
	10L	CNBG_4495	4.14905	Present at other side of chromosome
	10L	CNBG_4494	5.67943	Present at other side of chromosome
	1R	CNBG_10308		X
	1R	CNBG_3720	8.57331	✔️
	1L	CNBG_10000		Present at other side of chromosome
	1L	CNBG_2934	0.417624	Present at other side of chromosome
	4R	CNBG_10211		X
	4R	CNBG_10105		X
	4R	CNBG_6174	189.803	✔️
	4L	CNBG_10291		Present at other side of chromosome
	4L	CNBG_0541	31.6664	Present at other side of chromosome
	7R	CNBG_10214		X
	7R	CNBG_10183		X
	7R	CNBG_2029	71.8558	X
	7R	CNBG_2030	6.62803	X
	7R	CNBG_2031	7.59167	X
	7R	CNBG_2032	20.302	X
	7R	CNBG_2033	16.9877	X
	7R	CNBG_2034	44.5027	X
	7R	CNBG_2036	37.4489	✔️
	7L	CNBG_2485	0.227165	Present at other side of chromosome
	7L	CNBG_2484	75.6303	Present at other side of chromosome
Expression levels of genes where neocentromeres formed in the cenΔ mutants were analyzed in the R265 wild-type strain.
Previously generated RNA sequencing data were remapped to the R265 reference genome, and the expression levels (FPKM) were analyzed for
the native genes in each region wherein a neocentromere was formed in the cenΔ mutants [35]. Expression analysis of several housekeeping
genes was included for control purposes, and the median RNA expression level of all genes located on chromosomes 9 and 10 are listed.
Expression levels of genes located in the subtelomeric regions were also analyzed.
