# Supplementary material for: Centromere deletion in Cryptococcus deuterogattii leads to neocentromere formation and chromosome fusions
Source: eLife. 2020 Apr 20;9:e56026. doi: 10.7554/eLife.56026 (PMC7188483; doi:10.7554/eLife.56026)
Supplement: Supplementary file 3. — We have indicated whether each gene located in the subtelomeric regions was lost in the chromosomal fusion of the large-colony cen10∆ mutants. For each gene in the subtelomeric region of chromosome 1, 4, 7, and 10, several characteristics, such as the chromosomal location, putative function, and the presence of putative C. neoformans homologs in existing mutant libraries, are indicated. There is no correlation between the loss of genes with or without predicted function. [file elife-56026-supp3.xlsx]

## Sheet: Sup table 5
Supplementary File 3. Genes located in subtelomeric regions of chromosomes 1, 4, 7, and 10.
Sub telomeric region	Gene ID	Position of gene based on telomere	Chromosome location	Putative function	Present after chromosome fusion	C. neoformans homolog	Putative function of C. neoformans homolog	Synthenic	C. neoformans homolog present in knockout library
10R	CNBG_6141	1	10:808,557-811,688	Hypothetical protein	X	CNAG_05665	Hypothetical protein	✔️	X
10R	CNBG_6142	2	10:805,256-806,895	Branched-chain-amino-acid transaminase	X	CNAG_05664	Branched-chain-amino-acid transaminase	✔️	Madhani 2015
10R	CNBG_6143	3	10:800,576-803,649	Cell wall integrity protein scw1	X	CNAG_05663	Cell wall integrity protein scw1	✔️	Madhani 2015
10R	CNBG_6144	4	10:796,089-798,416	Sugar transporter	✔️	CNAG_05662	Polyol transporter protein 1 PTP1	✔️	Madhani 2008 and Madhani 2015
10L	CNBG_4495	1	10:601-3,764	Predicted protein	Present at other side of chromosome	Unique to C. deuterogattii	ND	ND	ND
10L	CNBG_4494	2	10:4,399-5,971	Hypothetical protein	Present at other side of chromosome	No homolog in C. neoformans	ND	ND	ND
1R	CNBG_10308	1	1:2,206,312-2,207,306	ND	X	ND	ND	ND	ND
1R	CNBG_3720	2	1:2,204,102-2,205,682	Hypothetical protein	✔️	No homolog in C. neoformans	ND	ND	ND
1L	CNBG_10000	1	1:3,548-5,589	ND	Present at other side of chromosome	ND	ND	ND	ND
1L	CNBG_2934	2	1:6,225-6,818	Hypothetical protein	Present at other side of chromosome	No homolog in C. neoformans	ND	ND	ND
4R	CNBG_10211	1	1,740,094-1,740,783	ND	X	ND	ND	ND	ND
4R	CNBG_10105	2	4:1,737,708-1,739,785	ND	X	ND	ND	ND	X
4R	CNBG_6174	3	4:1,734,189-1,736,937	Transketolase	✔️	CNAG_00866	Transketolase, transketolase, variant	✔️	Madhani 2016
4L	CNBG_10291	1	4:3,225-4,992	ND	Present at other side of chromosome	ND	ND	ND	ND
4L	CNBG_0541	2	4:6,010-9,384	Hypothetical protein	Present at other side of chromosome	CNAG_00010	Cation transporter	✔️	X
7R	CNBG_10214	1	7:1,241,250-1,242,246	ND	X	ND	ND	ND	ND
7R	CNBG_10183	2	7:1,240,383-1,240,898	ND	X	ND	ND	ND	ND
7R	CNBG_2029	3	7:1,237,355-1,239,923	Hypothetical protein	X	CNAG_06967	Phytase	✔️	Madhani 2015
7R	CNBG_2030	4	7:1,235,767-1,237,137	Metabolite transporter	X	Unique to C. deuterogattii	ND	ND	ND
7R	CNBG_2031	5	7:1,233,786-1,234,252	Hypothetical protein	X	CNAG_06966	Alkaline phosphatase D	✔️	Madhani 2016
7R	CNBG_2032	6	7:1,230,857-1,232,783	UDP-galactopyranose mutase	X	CNAG_07752	UDP-galactopyranose mutase	✔️	Madhani 2015
7R	CNBG_2033	7	7:1,228,774-1,230,252	Hypothetical protein	X	CNAG_06994	Hypothetical protein	✔️	Madhani 2008
7R	CNBG_2034	8	7:1,226,338-1,227,719	Hypothetical protein	X	CNAG_06993	Hypothetical protein	✔️	Madhani 2015
7R	CNBG_2036	9	7:1,221,116-1,223,113	Siderophore iron transporter mirB	✔️	CNAG_07751	Siderophore iron transporter mirB	✔️	Madhani 2016
7L	CNBG_2485	1	7:1,489-3,173	Hypothetical protein	Present at other side of chromosome	CNAG_03097	Hypothetical protein	✔️	Madhani 2016
7L	CNBG_2484	2	7:3,868-4,780	Predicted protein	Present at other side of chromosome	CNAG_03098	Hypothetical protein	✔️	X
We have indicated whether each gene located in the subtelomeric regions was lost in the chromosomal fusion of the large-colony cen10Δ mutants. For each gene in the subtelomeric region of chromosome 1, 4, 7, and 10 several characteristics as
the chromosomal location, putative function, and the presence of putative C. neoformans homologs in existing mutant libraries are indicated. There is no correlation between the loss of genes with or without predicted function.
