# Supplementary material for: Centromere deletion in Cryptococcus deuterogattii leads to neocentromere formation and chromosome fusions
Source: eLife. 2020 Apr 20;9:e56026. doi: 10.7554/eLife.56026 (PMC7188483; doi:10.7554/eLife.56026)
Supplement: Supplementary file 4. — For each primer, the lab identifier, purpose, and sequence are shown. [file elife-56026-supp4.xlsx]

## Sheet: Sup table 1
Supplementary File 4. Primers used in this study.
# Primer Heitman lab	Primer	Sequence	Purpose of primers
JOHE44300/KS29	M13_FWD	CGCCAGGGTTTTCCCAGTCACGAC	primers to delete CEN10
JOHE44301/KS30	M13_REV	AGCGGATAACAATTTCACACAGGA	primers to delete CEN10
JOHE44961/KS398	Cen10△_UF_FWD	GAACGCACTGGCAATGTGGA	primers to delete CEN10
JOHE44962/KS399	Cen10△_UF_REV	GTCGTGACTGGGAAAACCCTGGCGGATGGATTCCCCCAGCTCTT	primers to delete CEN10
JOHE44963/KS400	Cen10△_DF_FWD	TCCTGTGTGAAATTGTTATCCGCTGCATCATGCCATTCAGCCCT	primers to delete CEN10
JOHE44964/KS401	Cen10△_DF_REV	GGTGCAATCGGTTTGGAAGG	primers to delete CEN10
JOHE44965/KS402	Cen10△_Nested_FWD	GAACGCACTGGCAATGTGGA	primers to delete CEN10
JOHE44966/KS403	Cen10△_Nested_REV	GGTGCAATCGGTTTGGAAGG	primers to delete CEN10
JOHE44967/KS404	Cen10△_Inner_FWD	CCAAAAACTGCCCCATGCAC	primers to delete CEN10
JOHE44968/KS405	Cen10△_Inner_REV	TGTATGCTGCCGGTTTCCCT	primers to delete CEN10
JOHE44969/KS406	Cen10△_Out_FWD	TGCTTTGCGGACCAAGTGAG	primers to delete CEN10
JOHE44970/KS407	Cen10△_Out_REV	GCAAGCACCTTGGATGGCAA	primers to delete CEN10
JOHE45241/KS422	CEN10_probe_Fwd	GCAGCGGAATAATGGGTGGA	primers to delete CEN10
JOHE45242/KS423	CEN10_probe_Rev	CGATTCAATCTGGCAAGGGG	primers to delete CEN10
JOHE45316/KS433	T44_UF_Rev	TCCTCGCCCTTGCTCACCATTCTCCTACTCTTCCCTTTACTTTTTCTCTTC	CENPC construct
JOHE45317/KS434	T44_DF_Fwd	GTCGTGACTGGGAAAACCCTGGCGCGATAACCTGATCTGCGCGT	CENPC construct
JOHE45318/KS435	T44_DF_Rev	GAGCGAATGATGCGAAGACG	CENPC construct
JOHE45319/KS436	T44_nested_UF	CAGCGTTGTTCATCCTGCCA	CENPC construct
JOHE45320/KS437	T44_nested_DF	CGTCCAAACCTCCAAAACCG	CENPC construct
JOHE45381/KS454	1_Fwd	GCAGATGCATACAAAGCCCC	CEN10 test primers
JOHE45382/KS455	1_Rev	GCAGTGGAACAACAGGTGGA	CEN10 test primers
JOHE45383/KS456	2_Fwd	GGTTGGCCTGGAAGTCTTTG	CEN10 test primers
JOHE45384/KS457	2_Rev	CCGTCTTTGTATGGGGCAGA	CEN10 test primers
JOHE45385/KS458	3_Fwd	CATCTGGATTCCACTGGGCT	CEN10 test primers
JOHE45386/KS459	3_Rev	ATGCTGCCGGTTTCCCTGTT	CEN10 test primers
JOHE45387/KS460	4_Fwd	CGATTCAATCTGGCAAGGGG	CEN10 test primers
JOHE45388/KS461	4_Rev	TTGGTGGTAAGGGCTCTGCA	CEN10 test primers
JOHE45389/KS462	5_Fwd	TGATGCAGATTGGGGAGGAG	CEN10 test primers
JOHE45390/KS463	5_Rev	TCCACCCATTATTCCGCTGC	CEN10 test primers
JOHE45391/KS464	6_Fwd	GGATCAAGGGGGAGTGTTGGA	CEN10 test primers
JOHE45392/KS465	6_Rev	CGGTGTGGCAAGCTTTTTGC	CEN10 test primers
JOHE45393/KS466	7_Fwd	TGCTTCGTTGATACGGCGCT	CEN10 test primers
JOHE45394/KS467	7_Rev	ACTGGGTGCCTCACTGAGTGT	CEN10 test primers
JOHE45395/KS468	8_Fwd	CAGCCAGATGATGTGGCATTC	CEN10 test primers
JOHE45396/KS469	8_Rev	TGTGCATTGTCACTGGCCCA	CEN10 test primers
JOHE45397/KS470	9_Fwd	ATCTTGGGGTGGAGGGAGGAT	CEN10 test primers
JOHE45398/KS471	9_Rev	GCAGATGCTGGCACAAAGCA	CEN10 test primers
JOHE45409/KS474	T44_Mcherry_Fwd	GAAGAGAAAAAGTAAAGGGAAGAGTAGGAGAAGAATGGTGAGCAAGGGCGAG	CENPC construct
JOHE45410/KS475	T44_Mcherry_Rev	TCCTGTGTGAAATTGTTATCCGCTACCCAGCATCCAGCATCCAA	CENPC construct
JOHE45411/KS476	T44_UF_Rev_mcherry	CTCGCCCTTGCTCACCATTCTTCTCCTACTCTTCCCTTTACTTTTTCTCTTC	CENPC construct
JOHE45636/KS501	CEN6_Fwd1	GCCAACAAGGGTTTCCACCA	CEN6 control primers
JOHE45637/KS502	CEN6_Rev1	AAGCGCTGGAAAACAGCAGG	CEN6 control primers
JOHE45780/KS507	mCherry-CENPA_gene_Fwd	GCATGGACGAGCTGTACAAGGGTGGCGGTGGCATGGCAAGAACAGTAACGAGCCC	mCherry-CENPA
JOHE45781/KS508	mCherry-CENPA_gene_Rev	GTGTGAAATTGTTATCCGCTCACGGACATGGAACACGGAT	mCherry-CENPA
JOHE45782/KS509	mCherry-CENPA_UF-Prom_Fwd	TTTGAGGACTGGCTTGCGGA	mCherry-CENPA
JOHE45783/KS510	mCherry-CENPA_UF-Prom_Rev	TCCTCGCCCTTGCTCACCATCCCTCTGATCGCTTCGTTGA	mCherry-CENPA
JOHE45784/KS511	mCherry-CENPA_DF_Fwd	TGACTGGGAAAACCCTGGCGATCCGTGTTCCATGTCCGTG	mCherry-CENPA
JOHE45785/KS512	mCherry-CENPA_DF_Rev	TCATCCCCTTCTTGCTCGCA	mCherry-CENPA
JOHE45786/KS513	mCherry_Fwd	TCAACGAAGCGATCAGAGGGATGGTGAGCAAGGGCGAGGA	mCherry-CENPA
JOHE45787/KS514	mCherry_Rev	GGGCTCGTTACTGTTCTTGCCATGCCACCGCCACCCTTGTACAGCTCGTCCATGC	mCherry-CENPA
JOHE45788/KS515	mCherry-CENPA_nested_Fwd	ACAAATCCGGGGGCAACTTC	mCherry-CENPA
JOHE45789/KS516	mCherry-CENPA_nested_Rev	TTGAGGCTGGCGAGAAGGAA	mCherry-CENPA
JOHE46266/KS565	CNBG_4355_1_Fwd	TCCAGGTTTCTGGCGTAAAG	Genes in neocentromere
JOHE46267/KS566	CNBG_4355_1_Rev	CGGACTCCCACACTTGATCT	Genes in neocentromere
JOHE46268/KS567	CNBG_4355_2_Fwd	AGTCGGACGATTCACCTTTG	Genes in neocentromere
JOHE46269/KS568	CNBG_4355_2_Rev	CCCCACCATGCTTACTTGAT	Genes in neocentromere
JOHE46270/KS569	CNBG_9459_1_Fwd	CCATTCACGACCCAGAAGTT	Genes in neocentromere
JOHE46271/KS570	CNBG_9459_1_Rev	CCACGTTTTGACAGCAGAGA	Genes in neocentromere
JOHE46272/KS571	CNBG_9459_2_Fwd	TCTTGGGAAAATTGCCTGTC	Genes in neocentromere
JOHE46273/KS572	CNBG_9459_2_Rev	TCAAGAGCCCTTTTCAGCTC	Genes in neocentromere
JOHE46274/KS573	CNBG_4462_1_Fwd	TCGATAAAATGGGCGAAGAC	Genes in neocentromere
JOHE46275/KS574	CNBG_4462_1_Rev	CGCCAGGTAGATGAGGAGAG	Genes in neocentromere
JOHE46276/KS575	CNBG_4462_2_Fwd	CCCTACCTACGACGCTCTTG	Genes in neocentromere
JOHE46277/KS576	CNBG_4462_2_Rev	TGCCTGTTTCACTTCACTCG	Genes in neocentromere
JOHE46278/KS577	CNBG_4461_1_Fwd	AATTCCTCGTCCCAAGAGGT	Genes in neocentromere
JOHE46279/KS578	CNBG_4461_1_Rev	CTCTCCCGCTTGAGATTCTG	Genes in neocentromere
JOHE46280/KS579	CNBG_4461_2_Fwd	CCAAACTCGTTTCAGGAGGA	Genes in neocentromere
JOHE46281/KS580	CNBG_4461_2_Rev	TTCTTTATTTGGCCCACAGG	Genes in neocentromere
JOHE46282/KS581	CNBG_1429_1_Fwd	GTCCTACGAGCTTCCTGACG	Genes in neocentromere
JOHE46283/KS582	CNBG_1429_1_Rev	GCAGACTCGAGACCAAGGAG	Genes in neocentromere
JOHE46284/KS583	CNBG_1429_2_Fwd	CGGTCAAGTCATCACCATTG	Genes in neocentromere
JOHE46285/KS584	CNBG_1429_2_Rev	AGCAGACTCGAGACCAAGGA	Genes in neocentromere
JOHE46286/KS585	CNBG_1429_3_Fwd	GGAGCGTGGTTACCTCTTCA	Genes in neocentromere
JOHE46287/KS586	CNBG_1429_3_Rev	TACGACGAGTCTGGTCCCTC	Genes in neocentromere
JOHE46288/KS587	CNBG_1429_4_Fwd	GCTCAAGATTTAGCGACGAA	Genes in neocentromere
JOHE46289/KS588	CNBG_1429_4_Rev	ACTCCTTCACAGCTTCAGCA	Genes in neocentromere
JOHE46562/KS619	10-7_phusion1_Fwd	AACTAACACGCCTACCTGCC	Chromosome fusion Chr10-7
JOHE46563/KS620	10-7_phusion1_Rev	GTCAGAGACGATGTAGGCGG	Chromosome fusion Chr10-7
JOHE46566/KS623	10-1_phusion1_Fwd	TTTTCGCCCCTGGAAGATCC	Chromosome fusion Chr10-1
JOHE46567/KS624	10-1_phusion1_Rev	GGCCGTAGAAGATTCCCTCG	Chromosome fusion Chr10-1
JOHE46570/KS627	10-4_phusion1_Fwd	ACCGAGAAGGTCAAGCAAGG	Chromosome fusion Chr10-4
JOHE46571/KS628	10-4_phusion1_Rev	TGTCGCGGTGAAGAAGACAA	Chromosome fusion Chr10-4
JOHE50412/KS720	D60_UF_Rev	CTCACCATGCCACCGCCACCCATCATCGTTGCGAGTCTGT	MIS12 construct
JOHE50415/KS723	D60_Hyg_Fwd	CGAGCTGTACAAGTAAAGCGGATAACAATTTCACACAGGA	MIS12 construct
JOHE50416/KS724	D60_Hyg_Rev	TTATGGCGAGATGAGCCGACCGCCAGGGTTTTCCCAGTCACGAC	MIS12 construct
JOHE50417/KS725	D60_DF_Fwd	GTCGTGACTGGGAAAACCCTGGCGGTCGGCTCATCTCGCCATAA	MIS12 construct
JOHE50418/KS726	D60_DF_Rev	TGTCCTTCTCGGTGACTTGC	MIS12 construct
JOHE50419/KS727	D60_Nest_Fwd	CGGCATTCATCGTCGTCTCT	MIS12 construct
JOHE50420/KS728	D60_Nest_Rev	TGCCCTTATCGGTGGTTTCG	MIS12 construct
JOHE50546/KS781	D62_UF_Fwd	GGACCTGTGGTGAAGGGTCA	primers to delete CEN9
JOHE50547/KS782	D62_UF_Rev	GTCGTGACTGGGAAAACCCTGGCGTCTCAGGGTTGGGAGGTCAGT	primers to delete CEN9
JOHE50548/KS783	D62_DF_Fwd	TCCTGTGTGAAATTGTTATCCGCTGGGGCATACAGCCATGGAAT	primers to delete CEN9
JOHE50549/KS784	D62_DF_Rev	CCAGGTAGCGCGTTTCTGTA	primers to delete CEN9
JOHE50588/KS805	Cen9_A_385	ACCGGCAGGGTATACTGTTGTAGCAAAGTTTAGGGGTAGGTTTTAGAGCTAGAAATAG	Guide RNA to delete CEN9
JOHE50589/KS806	Cen9_A_23	ACCGGCAGGGTATACTGTTCTAAGTACAATGTAGGCACTGTTTTAGAGCTAGAAATAG	Guide RNA to delete CEN9
JOHE50694/KS807	62_out_Fwd	GCCTCCAAAAGCAATCGGTG	primers to delete CEN9
JOHE50695/KS808	62_out_Rev	TATACGGTGCGGTCGAGGTA	primers to delete CEN9
JOHE50697/KS810	D60_GFP_Fwd	ACAGACTCGCAACGATGATGGGAGGCGGAGGCGGAGGCAT	MIS12 construct
JOHE50698/KS811	D60_GFP_Rev	GTCGTGACTGGGAAAACCCTGGCGGTACAGCTCGTCCATGCCGT	MIS12 construct
JOHE51078/KS946	10-6_CNBG_10075_1_Fwd	GCGCGATCATTGACCCTAGA	Genes in neocentromere
JOHE51079/KS947	10-6_CNBG_10075_1_Rev	GTCGCAACTTCATGCCAAGG	Genes in neocentromere
JOHE51080/KS948	10-6_CNBG_10075_2_Fwd	ATTCATTCGGTCCAGGCGAG	Genes in neocentromere
JOHE51081/KS949	10-6_CNBG_10075_2_Rev	CCCTTCGGGTATGTGTTGCT	Genes in neocentromere
JOHE51082/KS950	10-5_CNBG_4495_1_Fwd	TGTCCTCTGGCGAAACCATC	Genes in neocentromere
JOHE51083/KS951	10-5_CNBG_4495_1_Rev	GACGCAGAGTCGTCTCGTAG	Genes in neocentromere
JOHE51084/KS952	10-5_CNBG_4495_2_Fwd	ACCTTGACTGCCTGAATCCG	Genes in neocentromere
JOHE51085/KS953	10-5_CNBG_4495_2_Rev	TGGTTTCGCCAGAGGACATC	Genes in neocentromere
JOHE51086/KS954	10-5_CNBG_10450_1_Fwd	GTACGCATTGGGGTTGAGGA	Genes in neocentromere
JOHE51087/KS955	10-5_CNBG_10450_1_Rev	GGCTCCAATAGTGGCCAAGT	Genes in neocentromere
JOHE51088/KS956	10-5_CNBG_10450_2_Fwd	GTGATATTGCTGGCTGCGAC	Genes in neocentromere
JOHE51089/KS957	10-5_CNBG_10450_2_Rev	AATGGCACGGGAACACTCAA	Genes in neocentromere
JOHE51090/KS958	10-4_CNBG_4379_1_Fwd	GACGAAGGGGAAGGAGATCG	Genes in neocentromere
JOHE51091/KS959	10-4_CNBG_4379_1_Rev	CCACCACCTATGGTCACACC	Genes in neocentromere
JOHE51092/KS960	10-4_CNBG_4379_2_Fwd	CCGTTCGCCATCTTTGTTGG	Genes in neocentromere
JOHE51093/KS961	10-4_CNBG_4379_2_Rev	AGGATTGCATCACCGCAGAA	Genes in neocentromere
JOHE51094/KS962	Cen9_CNBG_5685_1_Fwd	CTTGGCTGCATGTCATGATGG	Genes in neocentromere
JOHE51095/KS963	Cen9_CNBG_5685_1_Rev	GGGTTTACACGGCACCAAAC	Genes in neocentromere
JOHE51096/KS964	Cen9_CNBG_5685_2_Fwd	CTCATAGGGCTTGCGGTTGT	Genes in neocentromere
JOHE51097/KS965	Cen9_CNBG_5685_2_Rev	TCCATGCGTTACTCTCCTCC	Genes in neocentromere
JOHE51098/KS966	Cen9_CNBG_5684_1_Fwd	TGACGTTTGCCTGTCAACAAC	Genes in neocentromere
JOHE51099/KS967	Cen9_CNBG_5684_1_Rev	GAGCAGTCGCCATTTTCGAG	Genes in neocentromere
JOHE51100/KS968	Cen9_CNBG_5684_2_Fwd	CATACCGCGCCTCTTCAGTC	Genes in neocentromere
JOHE51101/KS969	Cen9_CNBG_5684_2_Rev	AAGCCATGGCCGATTGAGTA	Genes in neocentromere
JOHE51102/KS970	Cen9_CNBG_4377_1_Fwd	ACGTCGTGTTGCTTGGCTTA	Genes in neocentromere
JOHE51103/KS971	Cen9_CNBG_4377_1_Rev	CTGAGAGAAGGTGCAAGAGCA	Genes in neocentromere
JOHE51237/KS1041	CEN9_167_CNBG_9613_Fwd	CGAGATTGTTCTGCGCATGG	Genes in neocentromere
JOHE51238/KS1042	CEN9_167_CNBG_9613_Rev	ATGTCCTTTTGGCCATCGGT	Genes in neocentromere
JOHE51239/KS1043	CEN9_167_CNBG_5689_Fwd	CCGTGGAGAGGCTTGGAAAT	Genes in neocentromere
JOHE51240/KS1044	CEN9_167_CNBG_5689_Rev	TGCCGAAGTCGACACCTATC	Genes in neocentromere
JOHE51241/KS1045	CEN9_157_CNBG_5690_Fwd	TAACCTGCATCACGAGTCGG	Genes in neocentromere
JOHE51242/KS1046	CEN9_157_CNBG_5690_Rev	TCTACTGGCGAAAACCCGAG	Genes in neocentromere
JOHE51243/KS1047	CEN9_CNBG_5687_Fwd	GAGCAGATCTTTTCGGTGCG	Genes in neocentromere
JOHE51244/KS1048	CEN9_CNBG_5687_Rev	GAGAGAACGCTGCGGATGA	Genes in neocentromere
JOHE51245/KS1049	NeoCEN10-RNA-expression_control_Fwd	GGCCTTGCCCTTCACGATAA	Genes in neocentromere
JOHE51246/KS1050	NeoCEN10-RNA-expression_control_Rev	AGAAGGCTCAGCTCGTTGTC	Genes in neocentromere
JOHE51247/KS1051	NeoCen10-7_4372_Fwd	CGCCCACTTTGGGACATAGA	Genes in neocentromere
JOHE51248/KS1052	NeoCen10-7_4372_Rev	GCTCTTCCGCCCTGAGTATG	Genes in neocentromere
JOHE51249/KS1053	NeoCen10-7_4373_Fwd	TTTCGAGCCACAGAGGTCAC	Genes in neocentromere
JOHE51250/KS1054	NeoCen10-7_4733_Rev	ACACAATCAACAGTGGCGGA	Genes in neocentromere
JOHE51251/KS1055	NeoCen10-7_4370_Fwd	ATCTCATCACAACACGCCGA	Genes in neocentromere
JOHE51252/KS1056	NeoCen10-7_4730_Rev	CATCGCGCAAAACAGGAACA	Genes in neocentromere
For each primer, the lab identifier, purpose, and sequence are shown.
