# Supplementary material for: Centromere deletion in Cryptococcus deuterogattii leads to neocentromere formation and chromosome fusions
Source: eLife. 2020 Apr 20;9:e56026. doi: 10.7554/eLife.56026 (PMC7188483; doi:10.7554/eLife.56026)
Supplement: Supplementary file 5. — For each strain used in this study, the lab strain identifier, description, and parental strain are indicated. [file elife-56026-supp5.xlsx]

## Sheet: Sup table 2
Supplementary File 5. Strains used in this study.
Heitman lab ID	Name	Strain	Parental strain	Selection cassette	Reference
20096	KS1	R265 (Wild-type)	-	-	Fraser et al (2005)
20097	KS2	cen10△-A	R265	NAT	This study
20098	KS3	cen10△-B	R265	NAT	This study
20099	KS4	cen10△-C	R265	NAT	This study
20100	KS5	cen10△-D	R265	NEO	This study
20101	KS6	cen10△-E	R265	NAT	This study
20102	KS7	cen10△-F	R265	NAT	This study
20103	KS8	cen10△-G	R265	NAT	This study
20104	KS9	cen10△-A-S1	KS2	NAT	This study
20105	KS10	cen10△-A-L1	KS2	NAT	This study
20106	KS11	cen10△-B-S1	KS3	NAT	This study
20107	KS12	cen10△-B-S2	KS3	NAT	This study
20108	KS13	cen10△-B-S3	KS3	NAT	This study
20109	KS14	cen10△-B-L1	KS3	NAT	This study
20110	KS15	cen10△-B-L2	KS3	NAT	This study
20111	KS16	cen10△-C-S1	KS4	NAT	This study
20112	KS17	cen10△-C-S2	KS4	NAT	This study
20113	KS18	cen10△-C-S3	KS4	NAT	This study
20114	KS19	cen10△-C-L1	KS4	NAT	This study
20115	KS20	cen10△-C-L2	KS4	NAT	This study
20116	KS21	cen10△-E-S1	KS6	NAT	This study
20117	KS22	cen10△-E-S2	KS6	NAT	This study
20118	KS23	cen10△-E-S3	KS6	NAT	This study
20119	KS24	cen10△-E-L1	KS6	NAT	This study
20120	KS25	cen10△-E-L2	KS6	NAT	This study
20121	KS26	cen9△-A	R265	NAT	This study
20122	KS27	cen9△-B	R265	NAT	This study
20123	KS28	cen9△-C	R265	NAT	This study
20124	KS29	cen9△-D	R265	NAT	This study
20125	KS30	cen9△-E	R265	NAT	This study
20126	KS31	cen9△-F	R265	NAT	This study
20126	KS32	R265 MIS12	R265	NAT/NEO	This study
20126	KS33	cen10△-A MIS12	KS2	NAT/NEO	This study
20126	KS34	cen10△-B MIS12	KS3	NAT/NEO	This study
20126	KS35	cen10△-C MIS12	KS4	NAT/NEO	This study
20126	KS36	cen10△-D MIS12	KS5	NAT/NEO	This study
20126	KS37	cen10△-E MIS12	KS6	NAT/NEO	This study
20126	KS38	R265 CENPC	R265	NAT/NEO	This study
20126	KS39	cen9△-A CENPC	KS26	NAT/NEO	This study
20126	KS40	cen9△-B CENPC	KS27	NAT/NEO	This study
20126	KS41	cen9△-C CENPC	KS28	NAT/NEO	This study
20126	KS42	cen9△-D CENPC	KS29	NAT/NEO	This study
20126	KS43	cen9△-E CENPC	KS30	NAT/NEO	This study
For each strain used in this study, the lab strain identifier, description, and parental strain are indicated.
